# Supplementary material for: Participant-Centered Tolerability of Transcutaneous Auricular Vagus Nerve Stimulation: Insights from Two Crossover Studies
Source: Research Square preprint supplement (doi:10.21203/rs.3.rs-8817147/v1), 2026-02-24
Supplement: Supplementary file 1 [file adbbcb5963c6644f89a90073.docx]

**Appendix 1. taVNS Tolerability Form**

**taVNS Tolerability Form**

**Visits 1 and 2**

1A. Did you experience any **ear pain** DURING taVNS? (Check one)

Yes ______ No ______ **(if no, SKIP TO 2A)**

1B. How would you rate the **ear pain** you experienced DURING taVNS on a scale of 0 (lowest) to 10 (highest)? (Circle one)


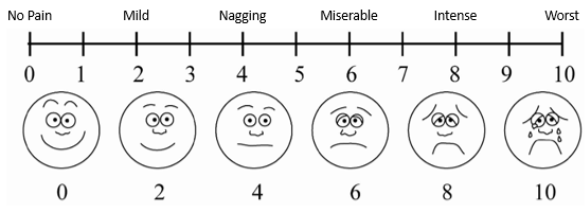


2A. Did you feel **tingling/tickling/pricking** DURING taVNS? (Check one)

Yes ______ No ______ **(if no, SKIP TO 3A)**

2B. How would you rate the **irritation** from **tingling/tickling/pricking** DURING taVNS on a scale of 0 (lowest) to 10 (highest)? (Circle one)


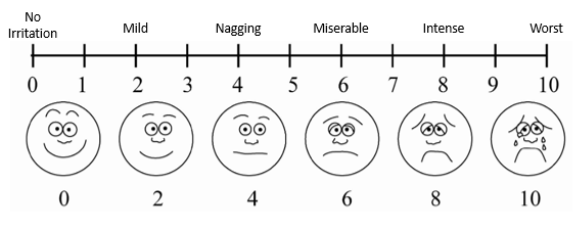


  3A. Did you feel **pain/discomfort** AFTER taVNS? (Check one)

Yes ______ No ______ **(If no, SKIP TO 4A)**

3B. How would you rate the **pain/discomfort** you experienced AFTER taVNS scale of 0 (lowest) to 10 (highest)? (Circle one)


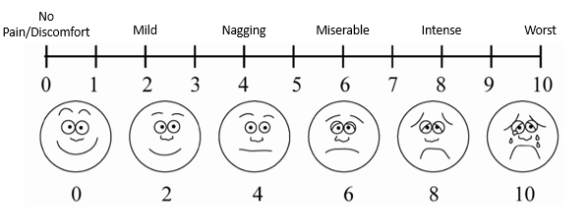


4A. Did you experience **any other side effects** from taVNS? (Check one)

Yes ______ No ______ **(if no, SKIP TO 6A)**

4B. How would you describe this side effect?  
  
____________________________________________________________________________

4C. Did you experience this **other side effect** DURING OR AFTER taVNS? (Check one)

During ______ After ______

4D. How would you rate the intensity of this **other side effect** from taVNS on a scale of 0 (lowest) to 10 (highest)? (Circle one)


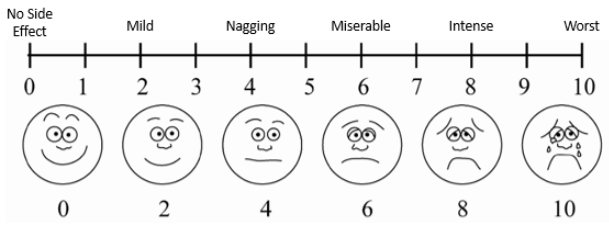


**If more than one additional side effect:**

5A. Did you experience any **other side effects** from taVNS? (Check one)

Yes ______ No ______ **(if no, SKIP TO 6)**

5B. How would you describe this side effect?  
  
  
____________________________________________________________________________

5C. Did you experience this **other side effect** DURING OR AFTER taVNS? (Check one)

During ______ After ______

5D. How would you rate the intensity of this **other side effect** from taVNS on a scale of 0 (lowest) to 10 (highest)? (Circle one)


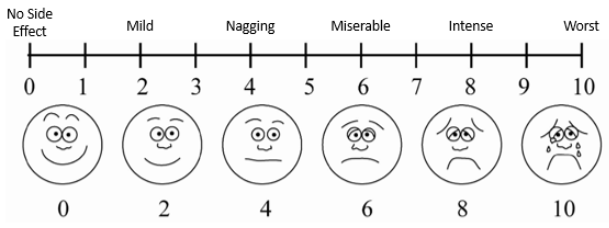


**Visit 2 ONLY**

6A. Did you experience any **ear pain** AFTER YOUR LAST VISIT? (Check one)

Yes ______ No ______ **(if no, SKIP TO 8A)**

6B. How would you rate the **ear pain** you experienced AFTER YOUR LAST VISIT on a scale of 0 (lowest) to 10 (highest)? (Circle one)


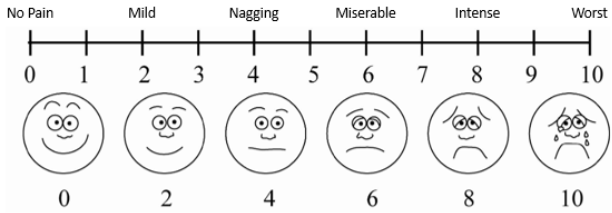


7A. Did you feel **discomfort** AFTER YOUR LAST VISIT? (Check one)

Yes ______ No ______ **(If no, SKIP TO 9A)**

7B. How would you rate the **discomfort** you experienced AFTER YOUR LAST VISIT scale of 0 (lowest) to 10 (highest)? (Circle one)


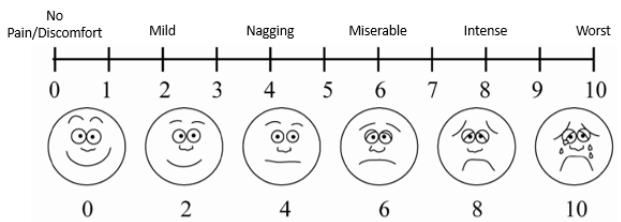


8A. Did you experience **any other side effects** AFTER YOUR LAST VISIT? (Check one)

Yes ______ No ______ **(IF NO, Go to next page)**

8B. How would you describe this side effect?  
 ____________________________________________________________________________

8C. How would you rate the intensity of this **other side effect** from taVNS on a scale of 0 (lowest) to 10 (highest)? (Circle one)c


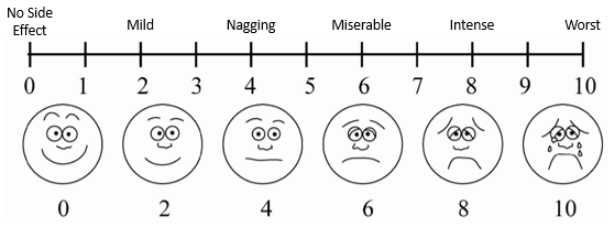


**Appendix 2. Confounding Variables**

| **Variable** | **Condition A (n=29)** | **Condition B (n=29)** | ***p*** | **Monophasic (n=30)** | **Biphasic (n=30)** | ***p*** |
| --- | --- | --- | --- | --- | --- | --- |
| Hours of sleep (median±SD) | 7±1.39 | 7±1.34 | 0.015 | 7.00±1.10 | 7.00±1.79 | 0.097 |
| % reporting poor to very poor sleep quality | 17.2% | 10.3% | 0.337 | 13.3% | 23.3% | 0.773 |
| % reporting ≥ 1 cup of coffee | 55.2% | 55.2% | 1.000* | 60% | 60% | 1.000* |
| % reporting ≥ 1 standard alcoholic drinks | 6.9% | 10.3% | 1.000* | 10% | 3.3% | 0.625* |
| % reporting ≥ 10 mins of exercise | 13.8% | 24.1% | 0.508* | 46.7% | 36.7% | 0.453* |
| % reporting a substance that may affect HRV or CNS processes | 44.8% | 41.4% | 1.000* | 46.7% | 56.7% | 0.250* |

| **Baseline PTQ Composite Scores:** | | |
| --- | --- | --- |
|  | **Median±SD** | ***p*** |
| Condition A | 18.00±9.48 | 0.580 |
| Condition B | 19.00±8.37 |
| **Baseline PANAS Positive and Negative Affect Scale Scores:** | | |
|  | **Median±SD** | ***p*** |
| Monophasic Positive Affect Scale | 22.00±9.15 | 0.700 |
| Biphasic Positive Affect Scale | 23.00±9.09 |
| Monophasic Negative Affect Scale | 2.50±2.80 | 0.609 |
| Biphasic Negative Affect Scale | 2.50±3.51 |

*McNemar Test (all others Wilcoxon signed-ranks test)

**Appendix 3. taVNS Tolerability Form Nominal Frequencies**

| **Question** | **Condition A (n=29)** | **Condition B (n=29)** | **Monophasic (n=30)** | **Biphasic**  **(n=30)** |
| --- | --- | --- | --- | --- |
| Did you experience any ear pain DURING taVNS? (# YES) | 7 | 8 | 5 | 5 |
| Did you feel tingling/tickling/pricking DURING taVNS? (# YES) | 26 | 25 | 26 | 24 |
| Did you feel pain/discomfort AFTER taVNS? (# YES) | 0 | 1 | 1 | 2 |
| Did you experience any other side effects from taVNS? (#YES) | 4 | 4 | 0 | 0 |
| Did you experience this other side effect DURING OR AFTER taVNS? (# During/ # After) | 3/1 | 3/1 | 0/0 | 0/0 |
| If more than one additional side effect: Did you experience any other side effects from taVNS? (# YES) | 1 | 0 | 0 | 0 |
| If experienced more than one additional side effect: Did you experience this other side effect DURING OR AFTER taVNS? (# During/ # After) | 1/0 | 0/0 | 0/0 | 0/0 |
| Did you experience any ear pain after your last visit? (# YES) | 0 | 0 | 0 | 1 |
| Did you feel any discomfort after your last visit? (# YES) | 0 | 0 | 0 | 0 |
| Did you experience any other side effects after your last visit? (# YES) | 3 | 1 | 1 | 1 |

**Appendix 4. taVNS Tolerability Form Scale Descriptives**

| **Question** | **Condition A**  **(n)**  **Median±SD** | **Condition B**  **(n)**  **Median±SD** | **Monophasic**  **(n)**  **Median±SD** | **Biphasic**  **(n)**  **Median±SD** |
| --- | --- | --- | --- | --- |
| How would you rate the ear pain you experienced DURING taVNS on a scale of 0 (lowest) to 10 (highest)? | (7)  2.00±2.06 | (8)  3.00±1.69 | (5)  2.00±1.79 | (5)  2.00±2.07 |
| How would you rate the irritation from tingling/tickling/pricking DURING taVNS on a scale of 0 (lowest) to 10 (highest)? | (26)  2.00±1.77 | (25)  2.00±1.77 | (26)  2.00±1.18 | (24)  2.50±1.47 |
| How would you rate the pain/discomfort you experienced AFTER taVNS scale of 0 (lowest) to 10 (highest)? | (0)  --- | (1)  3.00 | (1)  6.00 | (2)  1.50±0.71 |
| How would you rate the intensity of this other side effect from taVNS on a scale of 0 (lowest) to 10 (highest)? | (4)  1.50±1.71 | (4)  4.50±2.94 | (0)  --- | (0)  --- |
| How would you rate the intensity of this other side effect from taVNS on a scale of 0 (lowest) to 10 (highest)? | (1)  0.00 | (0)  --- | (0)  --- | (0)  --- |
| How would you rate the ear pain you experienced AFTER YOUR LAST VISIT on a scale of 0 (lowest) to 10 (highest)? | (0)  --- | (0)  --- | (0)  --- | (1)  1.00 |
| How would you rate the discomfort you experienced AFTER YOUR LAST VISIT scale of 0 (lowest) to 10 (highest)? | (0)  --- | (0)  --- | (0)  --- | (0)  --- |
| How would you rate the intensity of this other side effect from taVNS on a scale of 0 (lowest) to 10 (highest) after your last visit? | (3)  6.00±3.06 | (1)  2.00 | (1)  4.00 | (1)  3.00 |

**Appendix 5. Baseline HRV**

|  | **Condition A (median±SD)** | **Condition B**  **(median±SD)** | **Monophasic**  **(median±SD)** | **Biphasic**  **(median±SD)** |
| --- | --- | --- | --- | --- |
| Heart rate (bpm) | 67.00±10.83 | 67.00±10.72 | 67.00±10.287 | 68.50±8.96 |
| SDNN (ms) | 50.80±21.47 | 49.00±23.56 | 47.10±17.69 | 46.60±17.66 |
| RMSSD (ms) | 41.60±30.34 | 43.10±32.39 | 41.20±28.77 | 44.20±25.99 |
